# Supplementary material
Source: publisher site journal article supplement (https://www.dovepress.com/get_supplementary_file.php?f=341581.docx)
Supplement: Supplementary file 1 [file get_supplementary_file.php]

**Supplementary material**

**Table S1 Anti-inflammatory actions of acupuncture in other system diseases**

| **Refs.** | **Inflammatory model** | **Intervention methods** | **Acupoints** | **Acupuncture parameters** | **inflammation-related behaviors** | **Test sites** | **Biochemical measurements** |
| --- | --- | --- | --- | --- | --- | --- | --- |
| **1.1 Motor system** | | | | | | | |
| Li, 2020[91] | OA | MA | ST36, ST35 | Twisted for 1 min in 4 min, 6 times/30 min | TWL, MWT, OFT | Cartilage, synovial tissue, DRG | MCP-1↓, IL-1β↓, TNF-a↓, NGF↓, TrkA↓ |
| Wu, 2019[92] | OA | EA | Ex-LE4, ST35 | 2/100 Hz, 30 min, 8 weeks | — | Cartilage, synovial tissue | IKK-β↓, NF-κB p65↓, IκB-α↑, IL-1β↓, IL-6↓, TNF-α↓, MMP-3↓ |
| Xie, 2020[93] | Obese-induced OA | EA | ST36, GB34 | 30Hz, 2.0-3.0 mA, 10min, 2 weeks | — | Serum, articular synovial fluid | MIP-1α↓,MIP-2↓,IP-10↓,IL-1α↓, TNF-α↓, MCP-1↓, VEGF↓, leptin↓ |
| Wang, 2020[95] | OA | EA | Ex-LE4, ST35 | 2 Hz, 30 min, once every other day, 4 weeks | MWT | Cartilage | NLRP3↓, caspase-1↓, IL-1β↓, MMP-13↓ |
| Almeida, 2015[96] | Achilles tendon injury | MA+EA | ST36, BL57 | Rotated in clockwise and counterclockwise directions, 16 rotations each way; 2 Hz, 20 min, alternate days, 3 times/week, up to a maximum of 9 times | — | Achilles tendon | NCP↑ |
| Su, 2016[97] | Denervation-induced muscle atrophy | EA | ST36, GB34 | 20 Hz, 1.0 mA, 15 min, 2 weeks | — | Muscle | F4/80↑, arginase-1↑, IL-6↑, IFN-γ↑, TNF-α↑, TGF-β↑, IL-1β↑, IL-4↑, IL-13↑, IL-10↑, Pax7↑, MyoD↑, myogenin↑, embryonic myosin heavy chain↑, muscle catabolic proteins forkhead O transcription factor↓, myostatin↓, miR-1↑, miR-206↑, p-Akt↑, FoxO↓ |
| Yuan, 2018[99] | KOA | EA | Ex-LE4, ST35 | 2 Hz, 1.0 mA, 30min | OARSI score, mechanical allodynia, heat hyperalgesia | Menisci, fibroblasts | IL-1β↓, CB2 receptor↑ |
| **1.2 Circulatory system** | | | | | | | |
| Zhang, 2020[100] | AMI | EA  pre-treatment | PC6 | 2/15 Hz, 2.0 mA, 20 min, 3 days | — | Heart tissues | NLRP3↓, Caspase-1↓, IL-1β↓ |
| **1.3 Endocrine system** | | | | | | | |
| Lan, 2018[102] | Insulin resistance | EA | ST36, SP6, PC6, BL23 | 2/50 Hz, 20 min, 28 days | — | Plasma, vascular endothelium | FBG↓, FINS↓, C-P↓, IRS-1↑, Akt2↑, P-Akt2↑, eNOS↑ |
| Luo, 2018[103] | DIO | EA | ST36, ST40, CV3, CV4 | 2Hz, 1.0 mA, 10min | IPGT, IPIT | WAT, serum | FFA↓, TG↓, TC↓, Sirt1↑, NF-𝜅B mRNA↓, FBG↓ |
| Liaw, 2016[104] | Obesity | EA | CV12, CV4 | 10 Hz, 10-15 mA, 30 min, alternate weekdays, 3 times/week, 2 weeks | — | serum, adipose tissue | adiponectin / leptin↓, IL-10 / TNF-a↑, FBG↓ |
| Liaw, 2016[105] | Metabolic syndrome | EA | CV12, CV4 | 10 Hz, 15 mA, 30 min, alternate weekdays, 3 times/week, 2 weeks | — | serum | TNF-α↓, FBG↓ |
| Liaw, 2016[106] | Obesity | EA | CV12, CV4 | 10 Hz, 10-15 mA, 30 min, alternate weekdays, 3 times/week, 2 weeks | — | serum, adipose tissue | FBG↓, leptin↑, adiponectin / leptin↓, IL-10↑, IL-10 / TNF-a↑ |
| Ye, 2020[107] | DCM | EA | PC6, ST36 | 2 Hz, 0.5-1.0 mA, 30 min, 5 times/week, 4 weeks | — | serum, myocardial tissue | TNF-α↓, IL-1α↓, IL-1β↓, IL-6↓, IL-8↓, ICAM-1↓, MCP-1↓, FBG↓, P-Akt↑, P-AMPK↑, PIK3r6↑, IGF1R↓ |
| Tian, 2018[108] | Diabetic gastroparesis | EA | ST36 | LEA, 10Hz; HEA, 100Hz, 1.0-3.0 mA, 30min |  | serum, stomach specimens | IL-10↑, MDA↓, CD163↑, Arg-1↑, iNOS↓, HO-1↑ |
| Tang, 2020[109] | DPN | MA | BL13, BL20, BL23 | 20 min, 14 days | MWT, TWL | spinal cord | CXCR3↓, TNF-α↓, IL-1β↓, IL-6↓, GSP↓, P2X4↓, OX42↓ |
| **1.4 Genitourinary system** | | | | | | | |
| Chen, 2018[110] | OHSS | EA pretreatment | SP6, CV4 | 2/15Hz, 15 min | — | Ovaries | IL-6↓, TNF-α↓, MCP-1↓, VEGF↓, progesterone↓, testosterone↓ |
| Kim, 2017[112] | Maternally separated rat pups | MA | HT7 | Twisted twice/second, 30 s, 7 days | Tail suspension test | Plasma | CORT↓, IL-1β↓, IL-6↓, GDNF↓ |

**Note:** ↑, upregulated by acupuncture; ↓, downregulated by acupuncture

**Abbreviations:** OA, osteoarthritis; KOA, knee osteoarthritis; AMI, Acute myocardial ischemia; DIO, diet-induced obesity; DCM, diabetic cardiomyopathy; DPN, diabetic peripheral neuropathy; OHSS, ovarian hyperstimulation syndrome; LEA, low frequency; HEA, high frequency; WT, mechanical withdrawal threshold; TWL, thermal withdrawal latency; OFT, open field test; MWM, Morris water maze; OARSI, Osteoarthritis Research Society International; IPGT, intraperitoneal glucose tolerance tests; IPIT, intraperitoneal insulin tolerance tests; WAT, white adipose tissue; MCP-1, monocyte chemoactic protein 1; NGF, nerve growth factors; TrkA, nerve growth factor receptor tropomyosin receptor kinase A; MMP-3, matrix metalloproteinases 3; IP-10, interferon-inducible protein 10; VEGF, vascular endothelial growth factor; INF-γ, interferon-γ; NCP, non-collagenous protein; FBG, fasting blood glucose; FINS, serum insulin; C-P, C-peptide; IRS-1, insulin receptor substrate 1; TG, triglyceride; FFA, free fatty acid; TC, total cholesterol; IGF1R, type 1 insulin-like growth factor receptor; ICAM-1, intercellular cell adhesion molecule-1; MDA, malondialdehyde; GSP, glycosylated serum protein; OX42, complement receptor type 3; CORT, corticosterone; GDNF, glial cell-derived neurotrophic factor; ST36, *Zusanli*; ST35, *Dubi*; Ex-LE4, *Neixiyan*; GB34, *Yinlingquan*; BL57, *Chengshan*; PC6, *Neiguan*; SP6, *Sanyinjiao*; BL23, *Shenshu*; ST40, *Fenglong*; CV3, *Zhongji*; CV4, *Guanyuan*; CV12, *Zhongwan*; BL13, *Feishu*; BL20, *Pishu;* HT7*, Shenmen*

**References**

91. Li B, Jing L, Jia L, et al. Acupuncture reduces pain in rats with osteoarthritis by inhibiting MCP2/CCR2 signaling pathway. *Exp Biol Med (Maywood)*. 2020;245(18):1722-1731. doi:10.1177/1535370220952342

92. Wu GW, Chen J, Huang YM, et al. Electroacupuncture Delays Cartilage Degeneration by Modulating Nuclear Factor-κB Signaling Pathway. *Chin J Integr Med*. 2019;25(9):677-683. doi:10.1007/s11655-018-2916-8

93. Xie LL, Zhao YL, Yang J, et al. Electroacupuncture Prevents Osteoarthritis of High-Fat Diet-Induced Obese Rats. *Biomed Res Int*. 2020;2020:9380965. doi:10.1155/2020/9380965

95. Wang Z, Chen M, Wang B, et al. Electroacupuncture Alleviates Osteoarthritis by Suppressing NLRP3 Inflammasome Activation in Guinea Pigs. *Evid Based Complement Alternat Med*. 2020;2020:5476064. doi:10.1155/2020/5476064

96. Almeida Mdos S, Oliveira LP, Vieira CP, Guerra Fda R, Pimentel ER. Birefringence of collagen fibres in rat calcaneal tendons treated with acupuncture during three phases of healing. *Acupunct Med*. 2016;34(1):27-32. doi:10.1136/acupmed-2015-010845

97. Su Z, Hu L, Cheng J, et al. Acupuncture plus low-frequency electrical stimulation (Acu-LFES) attenuates denervation-induced muscle atrophy. *J Appl Physiol (1985)*. 2016;120(4):426-436. doi:10.1152/japplphysiol.00175.2015

99. Yuan XC, Wang Q, Su W, et al. Electroacupuncture potentiates peripheral CB2 receptor-inhibited chronic pain in a mouse model of knee osteoarthritis. *J Pain Res*. 2018;11:2797-2808. doi:10.2147/JPR.S171664

100. Zhang T, Yang WX, Wang YL, et al. Electroacupuncture preconditioning attenuates acute myocardial ischemia injury through inhibiting NLRP3 inflammasome activation in mice. *Life Sci*. 2020;248:117451. doi:10.1016/j.lfs.2020.117451

102. Lan D, Xu N, Sun J, et al. Electroacupuncture mitigates endothelial dysfunction via effects on the PI3K/Akt signalling pathway in high fat diet-induced insulin-resistant rats. *Acupunct Med*. 2018;36(3):162-169. doi:10.1136/acupmed-2016-011253

103. Luo D, Liu L, Liang FX, Yu ZM, Chen R. Electroacupuncture: A Feasible Sirt1 Promoter Which Modulates Metainflammation in Diet-Induced Obesity Rats. *Evid Based Complement Alternat Med*. 2018;2018:5302049. doi:10.1155/2018/5302049

104. Liaw JJ, Peplow PV. Differential Effect of Electroacupuncture on Inflammatory Adipokines in Two Rat Models of Obesity. *J Acupunct Meridian Stud*. 2016;9(4):183-190. doi:10.1016/j.jams.2016.02.002

105. Liaw JJ, Peplow PV. Effect of Electroacupuncture on Inflammation in the Obese Zucker Fatty Rat Model of Metabolic Syndrome. *J Acupunct Meridian Stud*. 2016;9(2):73-79. doi:10.1016/j.jams.2015.08.004

106. Liaw JJ, Peplow PV. Effects of Electroacupuncture on Pro-/Anti-inflammatory Adipokines in Serum and Adipose Tissue in Lean and Diet-induced Obese Rats. *J Acupunct Meridian Stud*. 2016;9(2):65-72. doi:10.1016/j.jams.2015.06.011

107. Ye Y, Birnbaum Y, Widen SG, et al. Acupuncture Reduces Hypertrophy and Cardiac Fibrosis, and Improves Heart Function in Mice with Diabetic Cardiomyopathy. *Cardiovasc Drugs Ther*. 2020;34(6):835-848. doi:10.1007/s10557-020-07043-4

108. Tian L, Song S, Zhu B, Liu S. Electroacupuncture at ST-36 Protects Interstitial Cells of Cajal via Sustaining Heme Oxygenase-1 Positive M2 Macrophages in the Stomach of Diabetic Mice. *Oxid Med Cell Longev*. 2018;2018:3987134. doi:10.1155/2018/3987134

109. Tang HY, Wang FJ, Ma JL, Wang H, Shen GM, Jiang AJ. Acupuncture attenuates the development of diabetic peripheral neuralgia by regulating P2X4 expression and inflammation in rat spinal microglia. *J Physiol Sci*. 2020;70(1):45. doi:10.1186/s12576-020-00769-8

110. Chen L, Sun HX, Xia YB, et al. Electroacupuncture decreases the progression of ovarian hyperstimulation syndrome in a rat model. *Reprod Biomed Online*. 2016;32(5):538-544. doi:10.1016/j.rbmo.2016.02.006

112. Kim D, Bae CH, Jun YL, Jeon H, Koo S, Kim S. Acupuncture alters pro-inflammatory cytokines in the plasma of maternally separated rat pups. *Chin J Integr Med*. 2017;23(12):943-947. doi:10.1007/s11655-017-2827-8
